# Supplementary material for: Epigenomic Analysis Reveals the KCNK9 Potassium Channel as a Potential Therapeutic Target for Adenomyosis
Source: MDPI journal article supplement (doi:10.3390/ijms23115973), 2022-05-26
Supplement: s1 [file s1]

**Table S1. Demographic of endometrium for immunohistochemistry analysis**

| Case ID        | Diagnosis   | Endometrium status   | Age | Specimen type | Mean ± SD  | P value* |
|----------------|-------------|----------------------|-----|---------------|------------|----------|
| For discovery  |             |                      |     |               |            |          |
| MAr-En-001     | Adenomyosis | proliferative        | 40  | Frozen        | 45.7 ± 3.5 | 0.91     |
| MAr-En-002     | Adenomyosis | weakly proliferative | 42  | Frozen        |            |          |
| MAr-En-003     | Adenomyosis | proliferative        | 48  | Frozen        | 45.3 ± 3.5 |          |
| MAr-En-004     | Adenomyosis | weakly proliferative | 54  | Frozen        |            |          |
| MAr-En-005     | Adenomyosis | proliferative        | 45  | Frozen        |            |          |
| MAr-En-006     | Fibroids    | proliferative        | 48  | Frozen        |            |          |
| MAr-En-007     | Fibroids    | proliferative        | 43  | Frozen        |            |          |
| For validation |             |                      |     |               |            |          |
| IHC-En-002     | Adenomyosis | early-secretory      | 39  | FFPE          | 46.7 ± 8.4 | 0.99     |
| IHC-En-003     | Adenomyosis | mid-secretory        | 46  | FFPE          |            |          |
| IHC-En-004     | Adenomyosis | mid-secretory        | 48  | FFPE          | 47 ± 4.2   |          |
| IHC-En-005     | Adenomyosis | mid-secretory        | 35  | FFPE          |            |          |
| IHC-En-006     | Adenomyosis | mid-secretory        | 50  | FFPE          |            |          |
| IHC-En-007     | Adenomyosis | mid-secretory        | 52  | FFPE          |            |          |
| IHC-En-008     | Adenomyosis | mid-secretory        | 45  | FFPE          |            |          |
| IHC-En-009     | Adenomyosis | late-secretory       | 49  | FFPE          |            |          |
| IHC-En-010     | Adenomyosis | late-secretory       | 43  | FFPE          |            |          |
| IHC-En-011     | Adenomyosis | late-secretory       | 34  | FFPE          |            |          |
| IHC-En-012     | Adenomyosis | late-secretory       | 43  | FFPE          |            |          |
| IHC-En-013     | Adenomyosis | proliferative        | 49  | FFPE          |            |          |
| IHC-En-014     | Adenomyosis | proliferative        | 53  | FFPE          |            |          |
| IHC-En-015     | Adenomyosis | proliferative        | 45  | FFPE          |            |          |
| IHC-En-016     | Adenomyosis | proliferative        | 41  | FFPE          |            |          |
| IHC-En-017     | Adenomyosis | proliferative        | 44  | FFPE          |            |          |
| IHC-En-018     | Adenomyosis | proliferative        | 44  | FFPE          |            |          |
| IHC-En-019     | Adenomyosis | proliferative        | 55  | FFPE          |            |          |
| IHC-En-021     | Adenomyosis | proliferative        | 34  | FFPE          |            |          |
| IHC-En-022     | Adenomyosis | proliferative        | 47  | FFPE          |            |          |
| IHC-En-023     | Adenomyosis | proliferative        | 43  | FFPE          |            |          |
| IHC-En-024     | Adenomyosis | proliferative        | 39  | FFPE          |            |          |
| IHC-En-025     | Adenomyosis | proliferative        | 54  | FFPE          |            |          |
| IHC-En-026     | Adenomyosis | weakly proliferative | 39  | FFPE          |            |          |
| IHC-En-027     | Adenomyosis | weakly proliferative | 57  | FFPE          |            |          |
| IHC-En-028     | Adenomyosis | weakly proliferative | 40  | FFPE          |            |          |
| IHC-En-029     | Adenomyosis | weakly proliferative | 53  | FFPE          |            |          |
| IHC-En-030     | Fibroids    | mid-secretory        | 44  | FFPE          |            |          |
| IHC-En-031     | Fibroids    | mid-secretory        | 44  | FFPE          |            |          |
| IHC-En-032     | Fibroids    | late-secretory       | 48  | FFPE          |            |          |
| IHC-En-033     | Fibroids    | late-secretory       | 44  | FFPE          |            |          |
| IHC-En-034     | Fibroids    | proliferative        | 44  | FFPE          |            |          |
| IHC-En-035     | Fibroids    | proliferative        | 45  | FFPE          |            |          |
| IHC-En-036     | Fibroids    | proliferative        | 47  | FFPE          |            |          |
| IHC-En-037     | Fibroids    | proliferative        | 52  | FFPE          |            |          |
| IHC-En-038     | Fibroids    | proliferative        | 49  | FFPE          |            |          |
| IHC-En-039     | Fibroids    | proliferative        | 42  | FFPE          |            |          |
| IHC-En-040     | Fibroids    | proliferative        | 41  | FFPE          |            |          |
| IHC-En-041     | Fibroids    | weakly proliferative | 56  | FFPE          |            |          |
| IHC-En-042     | Fibroids    | weakly proliferative | 52  | FFPE          |            |          |
| IHC-En-043     | Fibroids    | weakly proliferative | 48  | FFPE          |            |          |
| IHC-En-044     | Fibroids    | weakly proliferative | 49  | FFPE          |            |          |

\*Two-tailed Welch-test. FFPE, formalin-fixed, paraffin-embedded.

**Table S2. Functional enrichments of selected genes**

| GO                                                                      | Gene Name                                                                                                                                   | P-value |
|-------------------------------------------------------------------------|---------------------------------------------------------------------------------------------------------------------------------------------|---------|
| <b>Low methylation and high gene expression in adenomyosis</b>          |                                                                                                                                             |         |
| 1. Multicellular organism development                                   | <i>ZAR1, HOXC12, LMO2, ZNF541, PRM1, LIMD1, NKX2-4</i>                                                                                      | 3.9E-03 |
| 2. Regulation of transcription, DNA-templated                           | <i>HOXC12, BRF1, SOX1, HINT1, NKX6-2, SP5, LIMD1, NKX2-4, FZD7, ZNF23</i>                                                                   | 1.0E-02 |
| 3. Potassium ion transport                                              | <i>KCNMB3, KCNK9, KCNA6</i>                                                                                                                 | 2.4E-02 |
| 4. Spinal cord association neuron                                       | <i>TAL1, GSX1</i>                                                                                                                           | 3.7E-02 |
| 5. Hypothalamus development differentiation                             | <i>RAX, GSX1</i>                                                                                                                            | 4.3E-02 |
| <b>High methylation and low gene expression in adenomyosis</b>          |                                                                                                                                             |         |
| 1. Negative regulation of transcription from RNA polymerase II promoter | <i>BACH1, AEBP1, ZNF593, HIST1H1D, KLF11, FHL2, DUSP22, SMAD3, WHSC1, REST, WWTR1, GLI3, CHD8, SIN3A, ATN1, HEYL, GATAD2B, PTCH1, PRDM1</i> | 1.2E-04 |
| 2. Aorta development                                                    | <i>LTBP1, PRICKLE1, PRDM1, MYH10</i>                                                                                                        | 5.7E-04 |
| 3. Osteoblast differentiation                                           | <i>MRC2, FHL2, COL6A1, WWTR1, GPNMB, IGFBP3</i>                                                                                             | 2.8E-03 |
| 4. Negative regulation of canonical Wnt signaling pathway               | <i>WNT5A, CHD8, PPP2R3A, PRICKLE1, BICC1, WWTR1, GLI3</i>                                                                                   | 4.1E-03 |
| 5. Negative regulation of transcription, DNA-templated                  | <i>WNT5A, CHD8, SIN3A, PRICKLE1, KLF11, HEYL, POU2F1, KCTD1, FHL2, LRRFIP1, REST, GLI3</i>                                                  | 6.7E-03 |
| 6. Negative regulation of fat cell differentiation                      | <i>WNT5A, SMAD3, ZADH2, WWTR1</i>                                                                                                           | 6.7E-03 |
| 7. branching involved in ureteric bud morphogenesis                     | <i>PAX8, PTCH1, GLI3, HOXD11</i>                                                                                                            | 6.7E-03 |
| 8. in utero embryonic development                                       | <i>CHD8, SIN3A, SYF2, SMAD3, PTCH1, GLI3, MYH10</i>                                                                                         | 7.8E-03 |
